# Supplementary material
Source: PubMed Central journal article supplement (PMC4633297)
Supplement: NIHMS3489-supplement-Supplemental_Figure_1.pdf [file NIHMS3489-supplement-Supplemental_Figure_1.pdf]

## Supplemental Figure 1

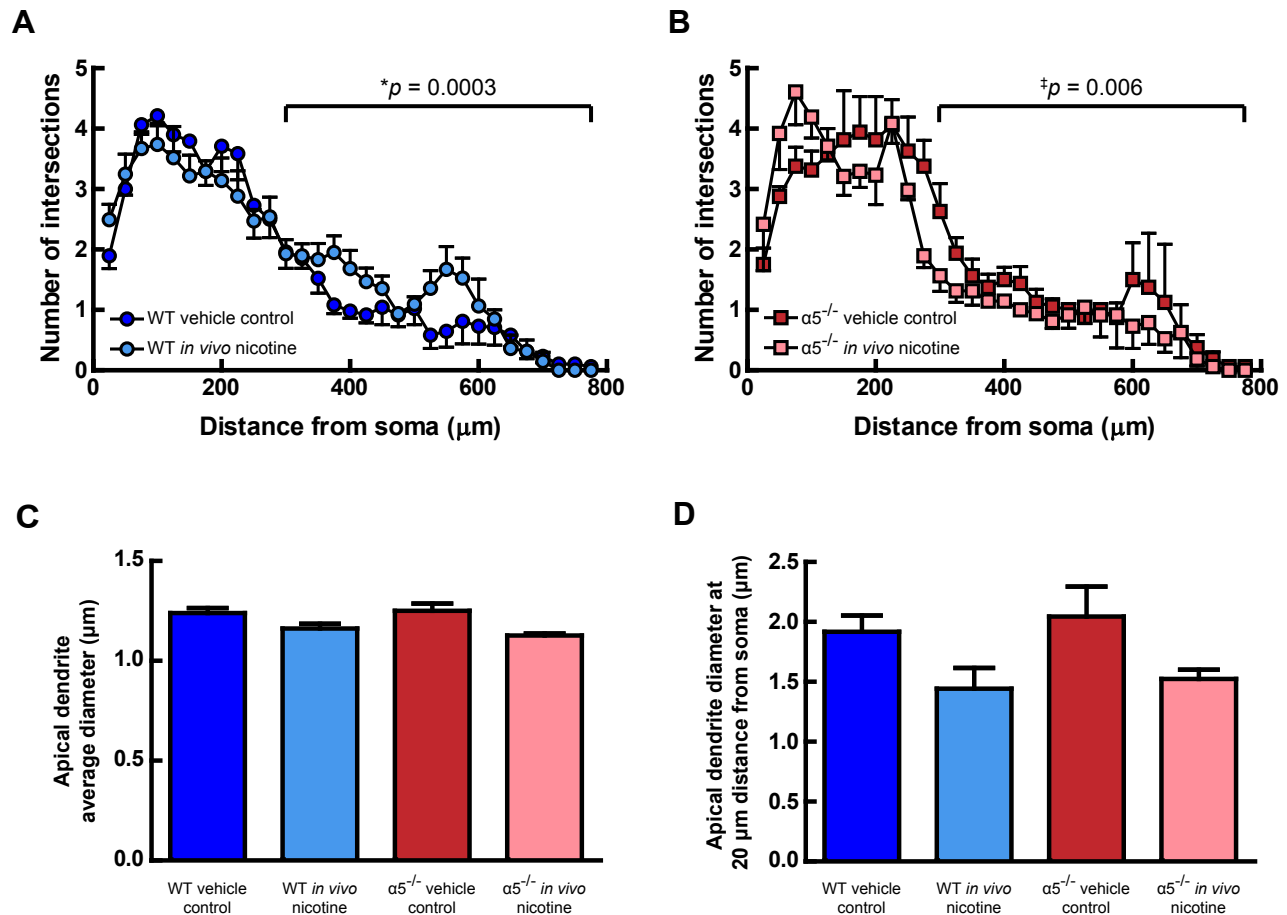

**Supplemental Figure 1.** Effects of developmental *in vivo* nicotine exposure on apical dendrite morphology in adult mice, with experimental animals represented as independent units. Three-dimensional Sholl analysis demonstrates that developmental *in vivo* nicotine increases distal apical dendrite complexity for wildtype mice (A, two-way ANOVA, main effect of developmental *in vivo* nicotine,  $F(1,120) = 13.85$ ,  $*p = 0.0003$ ) and decreases distal apical dendrite complexity for  $\alpha 5^{-/-}$  mice (B, main effect of developmental *in vivo* nicotine,  $F(1,120) = 7.69$ ,  $*p = 0.006$ ). Developmental *in vivo* nicotine exposure also decreased average dendrite diameter along apical dendrite trees (C, two-way ANOVA, main effect of developmental *in vivo* nicotine,  $F(1,12) = 15.13$ ,  $p = 0.002$ ) and also decreased the diameter of apical dendrites measured at a distance of 20  $\mu\text{m}$  from the soma (D, main effect of developmental *in vivo* nicotine,  $F(1,12) = 8.44$ ,  $p = 0.01$ ). All data are shown as mean  $\pm$  SEM for four mice in each experimental group.
