# Supplementary material
Source: PubMed Central journal article supplement (PMC4633297)
Supplement: NIHMS3489-supplement-Supplemental_Figure_2.pdf [file NIHMS3489-supplement-Supplemental_Figure_2.pdf]

## Supplemental Figure 2

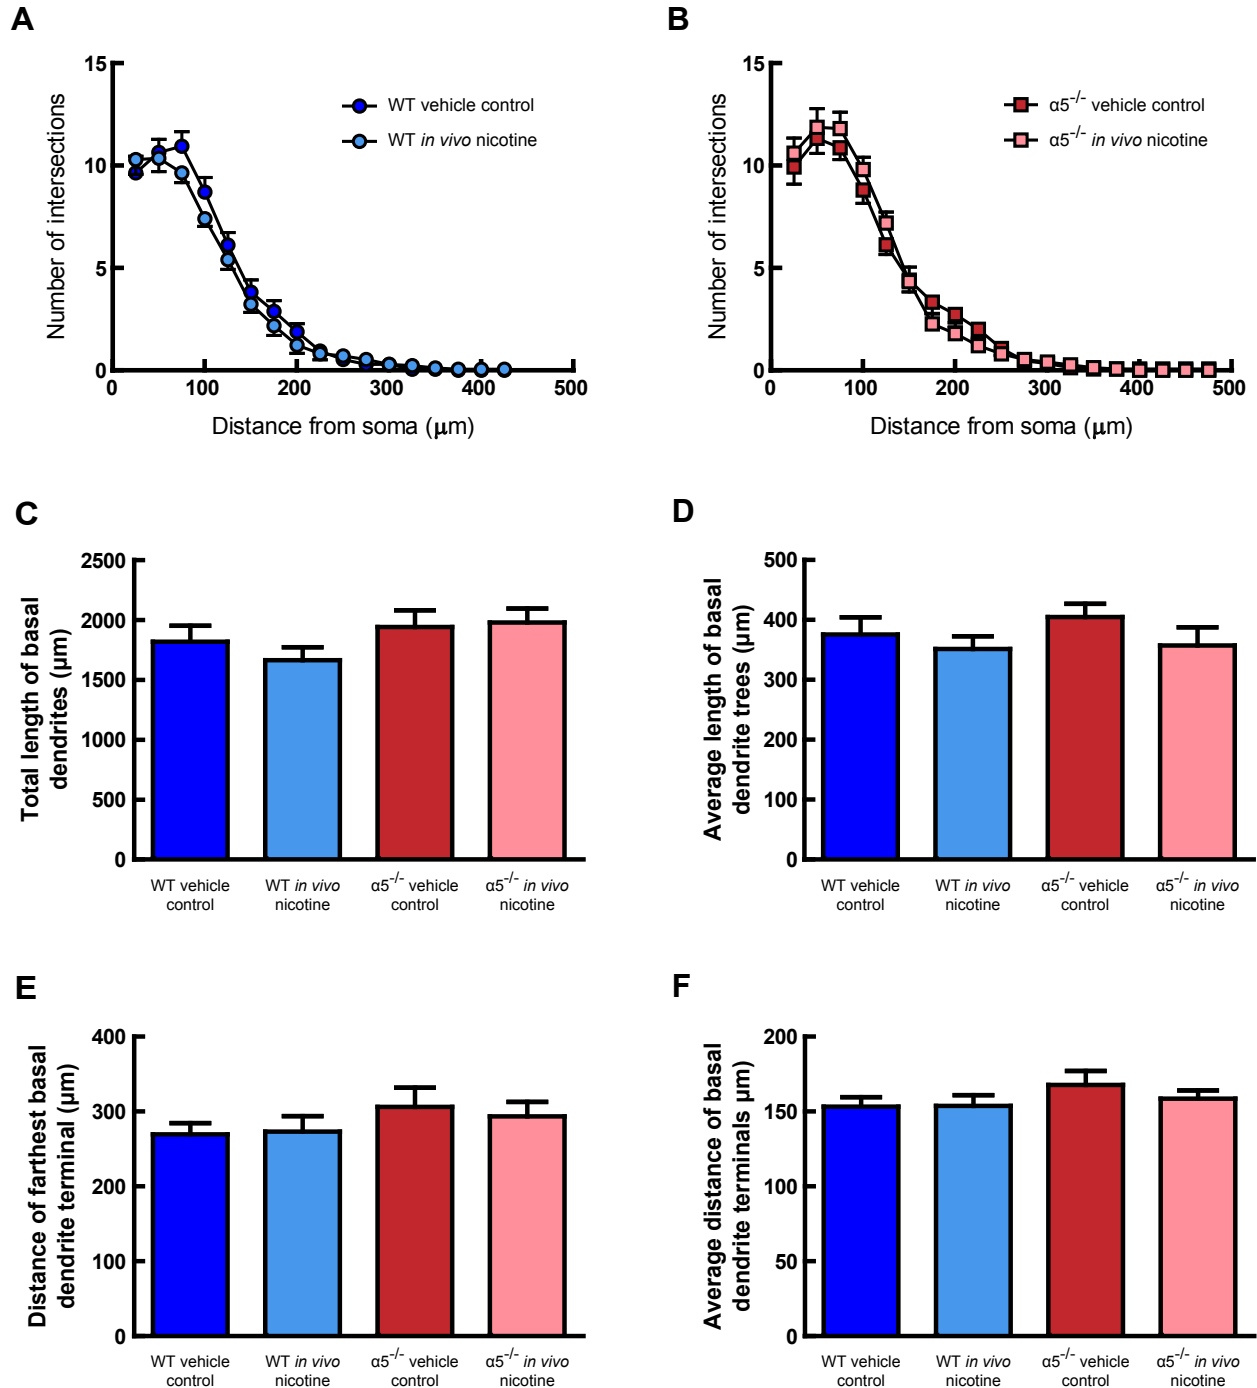

**Supplemental Figure 2.** Developmental *in vivo* nicotine exposure did not affect basal dendrite morphology for adult mice of either genotype. *A* and *B*, Sholl analysis of basal dendrite trees revealed no effect of developmental *in vivo* nicotine on dendrite complexity for either wildtype mice (two-way ANOVA, main effect of developmental *in vivo* nicotine,  $F(1,544) = 2.98$ ,  $p = 0.1$ ) or  $\alpha 5^{-/-}$  mice (main effect of developmental *in vivo* nicotine,  $F(1,532) = 0.16$ ,  $p = 0.7$ ). There was also no effect of developmental *in vivo* nicotine exposure within either genotype on the total length of basal dendrites (*C*), the average length of basal dendrite trees (*D*), the distance of the farthest basal dendrite terminal from the soma (*E*) or the average distance of basal dendrite terminals from the soma (*F*) (all  $p > 0.05$ ).
